# Supplementary material for: Brominated Flame Retardants in Antarctic Air in the Vicinity of Two All-Year Research Stations
Source: MDPI journal article supplement (doi:10.3390/atmos12060668), 2021-05-24
Supplement: s1 [file s1]

# **Brominated Flame Retardants in Antarctic Air in the Vicinity of Two All-Year Research Stations**

Susan M. Bengtson Nash <sup>1,\*</sup>, Seanan Wild <sup>1</sup>, Sara Broomhall <sup>2</sup> and Pernilla Bohlin-Nizzetto <sup>3</sup>

<sup>1</sup> The Southern Ocean Persistent Organic Pollutants Program (SOPOPP),  
Centre for Planetary Health and Food Security, Griffith University, Nathan 4111, Australia;  
seananw@gmail.com

<sup>2</sup> Australian Government Department of Agriculture, Water and the Environment,  
Emerging Contaminants Section, Canberra 2601, Australia; Sara.Broomhall@awe.gov.au

<sup>3</sup> P.O. Box 100, NILU—Norwegian Institute for Air Research, NO-2027 Kjeller, Norway; pbn@nilu.no

\* Correspondence: s.bengtsonnash@griffith.edu.au

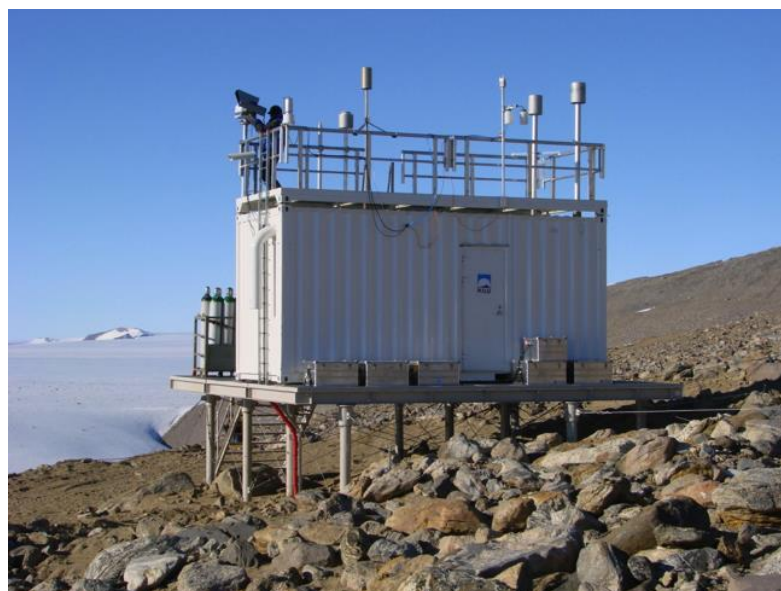

**Figure S1.** Trollhaugen atmospheric monitoring observatory.

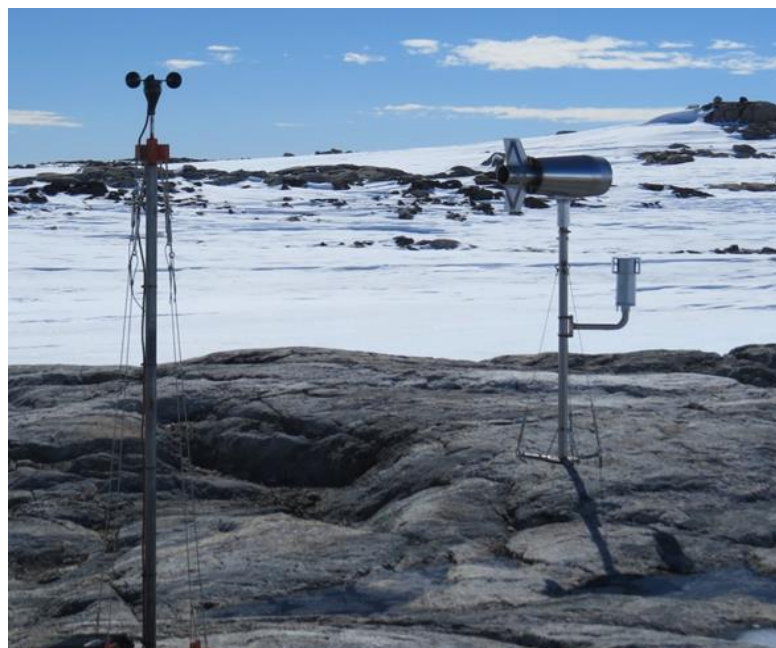

**Figure S2.** Photograph of the HFTPAS (rights) and anemometer plus logger unit (left) installed at Casey Station.

**Table S1.** Casey Station sample-sets (A-I1) together with corresponding sampling periods and Sample volume. '-' denotes sample sets in the series for which Brominated compound measurements are not available.

| Sample ID | Start Date | Finish Date | Sampling Duration (weeks) | Wind Volume Captured (m <sup>3</sup> ) |
|-----------|------------|-------------|---------------------------|----------------------------------------|
| A         | 4.12.09    | 05.02.10    | 9.6                       | 49,719                                 |
| B         | 11.02.10   | 08.06.10    | 16.7                      | 67,038 <sup>1</sup>                    |
| C         | 08.06.10   | 02.09.10    | 12.3                      | 95,304                                 |
| D         | 02.09.10   | 16.11.10    | 10.7                      | 37,722                                 |
| E         | 16.11.10   | 12.02.11    | 8.1                       | 71,930 <sup>2</sup>                    |
| F         | 21.02.11   | 04.06.11    | 14.6                      | 110,694 <sup>2</sup>                   |
| G         | -          | -           | -                         | -                                      |
| H         | 06.02.12   | 09.03.12    | 4.6                       | 46,513 <sup>1</sup>                    |
| I         | 09.03.12   | 08.04.12    | 4.3                       | 44,277 <sup>1</sup>                    |
| J         | 08.04.12   | 16.05.12    | 5.4                       | 71,971                                 |
| K         | -          | -           | -                         | -                                      |
| L         | 19.06.12   | 27.07.12    | 5.4                       | 43,565                                 |
| M         | 27.07.12   | 07.09.12    | 6.2                       | 61,601 <sup>1</sup>                    |
| N         | 07.09.12   | 09.10.12    | 4.7                       | 53,760 <sup>2</sup>                    |
| O         | 09.10.12   | 11.11.12    | 4.7                       | 68,958                                 |
| P         | 11.11.12   | 11.12.12    | 4.3                       | 40,975                                 |
| Q         | 30.12.13   | 04.02.13    | 5.1                       | 13,860                                 |
| R         | 04.02.13   | 18.03.13    | 6.4                       | 26,161                                 |
| S         | 18.03.13   | 22.04.13    | 4.6                       | 24,120                                 |
| Sample ID | Start Date | Finish Date | Sampling Duration (weeks) | Air Volume Sampled (m <sup>3</sup> )   |
| T         | 22.04.13   | 20.05.13    | 4.0                       | 41,843                                 |
| U         | 20.05.13   | 01.07.13    | 6.0                       | 43,687                                 |
| V         | -          | -           | -                         | -                                      |
| W         | 13.08.13   | 06.09.13    | 3.4                       | 20,494                                 |
| X         | 06.09.13   | 17.10.13    | 5.9                       | 60,392                                 |
| Y         | 17.10.13   | 18.11.13    | 5.4                       | 19,869                                 |

<sup>1</sup> Calculated partially using surrogate wind data obtained from the Bureau of Meteorology monitoring station 300017 (Casey Station, Antarctica)

<sup>2</sup> Calculated entirely using surrogate wind data obtained from the Bureau of Meteorology monitoring station 300017 (Casey Station, Antarctica)

|           |          |          |     |                      |
|-----------|----------|----------|-----|----------------------|
| <b>Z</b>  | 18.11.13 | 24.12.13 | 5.1 | 13,866               |
| <b>A1</b> | 12.01.14 | 17.02.14 | 5.1 | 32,805               |
| <b>B1</b> | -        | -        | -   | -                    |
| <b>C1</b> | 24.03.14 | 28.04.14 | 5.0 | 16,250               |
| <b>D1</b> | -        | -        | -   | -                    |
| <b>E1</b> | 02.06.14 | 07.07.14 | 5.0 | 34,925               |
| <b>F1</b> | 07.07.14 | 18.08.14 | 5.9 | 25,592               |
| <b>G1</b> | 18.08.14 | 24.09.14 | 5.3 | 118,160 <sup>2</sup> |
| <b>H1</b> | 24.09.14 | 20.10.14 | 3.7 | 29,552 <sup>2</sup>  |
| <b>I1</b> | 20.10.14 | 27.11.14 | 5.0 | 38,406               |

---

Calculated partially using surrogate wind data obtained from the Bureau of Meteorology monitoring station 300017 (Casey Station, Antarctica)

Calculated entirely using surrogate wind data obtained from the Bureau of Meteorology monitoring station 300017 (Casey Station, Antarctica)

**Table S2.** 2013 Troll Station samples together with corresponding sampling periods and captured wind volume.

| <b>Sample ID</b> | <b>Start Date</b> | <b>Finish Date</b> | <b>Air Volume Sampled (m<sup>3</sup>)</b> |
|------------------|-------------------|--------------------|-------------------------------------------|
| <b>1</b>         | 11.02.13          | 18.02.13           | 3,546                                     |
| <b>2</b>         | 18.02.13          | 25.02.13           | 2,688                                     |
| <b>3</b>         | 25.02.13          | 04.03.13           | 2,674                                     |
| <b>4</b>         | 04.03.13          | 11.03.13           | 2,684                                     |
| <b>5</b>         | 11.03.13          | 18.03.13           | 3,706                                     |
| <b>6</b>         | 18.03.13          | 25.03.13           | 2,474                                     |
| <b>7</b>         | 25.03.13          | 01.04.13           | 2,719                                     |
| <b>8</b>         | 01.04.13          | 08.04.13           | 3,664                                     |
| <b>9</b>         | 04.04.13          | 15.04.13           | 3,117                                     |
| <b>10</b>        | 15.04.13          | 22.04.13           | 2,220                                     |
| <b>11</b>        | 22.04.13          | 29.04.13           |                                           |
| <b>12</b>        | 29.04.13          | 06.05.13           | 2,705                                     |
| <b>13</b>        | 06.05.13          | 13.05.13           | 3,709                                     |
| <b>14</b>        | 13.05.13          | 20.05.13           | 2,957                                     |
| <b>15</b>        | 20.05.13          | 27.05.13           | 3,150                                     |
| <b>16</b>        | 03.06.13          | 10.06.13           | 3,141                                     |
| <b>17</b>        | 10.06.13          | 17.06.13           | 3,423                                     |
| <b>18</b>        | 17.06.13          | 24.06.13           | 3,257                                     |
| <b>19</b>        | 24.06.13          | 01.07.13           | 3,438                                     |
| <b>20</b>        | 01.07.13          | 08.07.13           | 3,047                                     |
| <b>21</b>        | 08.07.13          | 15.07.13           | 2,865                                     |
| <b>22</b>        | 15.07.13          | 22.07.13           | 3,052                                     |
| <b>23</b>        | 22.07.13          | 29.07.13           | 2,525                                     |
| <b>24</b>        | 29.07.13          | 05.08.13           | 3,200                                     |
| <b>25</b>        | 05.08.13          | 12.08.13           | 3,223                                     |
| <b>26</b>        | 12.08.13          | 19.08.13           | 2,750                                     |
| <b>27</b>        | 19.08.13          | 26.08.13           | 1,911                                     |
| <b>28</b>        | 26.08.13          | 02.09.13           | 2,863                                     |
| <b>29</b>        | 02.09.13          | 09.09.13           | 2,699                                     |
| <b>30</b>        | 09.09.13          | 16.09.13           | 3,098                                     |
| <b>31</b>        | 16.09.13          | 23.09.13           | 2,943                                     |
| <b>32</b>        | 23.09.13          | 30.09.13           | 2,877                                     |
| <b>33</b>        | 30.09.13          | 07.10.13           | 1,921                                     |
| <b>34</b>        | 07.10.13          | 14.10.13           | 2,277                                     |
| <b>35</b>        | 14.10.13          | 21.10.13           | 2,602                                     |
| <b>36</b>        | 21.10.13          | 28.10.13           | 3,369                                     |
| <b>37</b>        | 28.10.13          | 04.11.13           | 3,461                                     |
| <b>38</b>        | 04.11.13          | 11.11.13           | 3,896                                     |
| <b>39</b>        | 11.11.13          | 18.11.13           | 2,175                                     |

**Table S3.** Casey Station chemical concentrations by sample set (2 sig. figures). Values are travel blank corrected (LOQ). Concentrations are presented in fg/m<sup>3</sup> to two significant figures. 'ND' denotes non-detected values. In 2010 congeners BDE-49 and BDE-71 were co-quantified (\*).

|                | A    | B               | C    | D     | E           | F     | H               | I     | J     | L     | M     |
|----------------|------|-----------------|------|-------|-------------|-------|-----------------|-------|-------|-------|-------|
| <b>TBA</b>     | 39.0 | 120.0           | 43.0 | 46.0  | 47.0        | 35.0  | ND              | 56.0  | 47.0  | 92.0  | 42.0  |
| <b>BDE-28</b>  | 2.0  | 0.93            | 0.52 | 0.25  | ND          | 0.033 | 0.076           | 0.018 | 0.22  | 0.58  | 0.32  |
| <b>BDE-47</b>  | 13.0 | 29.0            | 17.0 | 7.8   | ND          | 0.033 | 4.5             | 1.4   | 1.0   | 4.4   | 1.38  |
| <b>BDE-49</b>  | 1.3  | 1.2             | 0.44 | ND    | ND          | 0.89  | 0.25            | 0.5   | 0.034 | 0.41  | 0.11  |
| <b>BDE-66</b>  | 26.0 | 0.33            | ND   | ND    | ND          | 0.043 | 0.23            | 0.38  | 0.19  | 0.59  | 0.21  |
| <b>BDE-71</b>  | *    | *               | *    | *     | ND          | ND    | ND              | 0.13  | ND    | ND    | ND    |
| <b>BDE-77</b>  | ND   | ND              | ND   | ND    | ND          | ND    | ND              | 0.11  | ND    | ND    | ND    |
| <b>BDE-85</b>  | ND   | 0.29            | ND   | ND    | 0.039       | 0.026 | ND              | ND    | ND    | ND    | 0.035 |
| <b>BDE-99</b>  | 4.3  | 7.8             | 1.3  | 2.8   | ND          | 0.91  | 6.6             | 0.23  | 0.40  | 8.4   | 0.13  |
| <b>BDE-100</b> | 1.9  | 2.3             | 0.83 | 0.77  | ND          | 0.17  | 1.2             | ND    | 0.058 | 0.77  | 0.026 |
| <b>BDE-119</b> | ND   | ND              | ND   | ND    | ND          | ND    | ND              | ND    | ND    | ND    | ND    |
| <b>BDE-138</b> | ND   | ND              | ND   | ND    | ND          | ND    | ND              | ND    | ND    | ND    | ND    |
| <b>BDE-153</b> | ND   | 0.5606<br>77526 | ND   | ND    | 0.10        | 0.23  | 0.31            | ND    | 0.035 | 0.66  | 0.12  |
| <b>BDE-154</b> | ND   | 0.3667<br>96444 | ND   | ND    | 0.0007<br>2 | 0.13  | 0.39            | 0.025 | 0.13  | 0.24  | 0.048 |
| <b>BDE-183</b> | ND   | 1.0             | ND   | 1.3   | 0.21        | 0.57  | ND              | 0.16  | ND    | 0.22  | 0.23  |
| <b>BDE-196</b> | ND   | 2.6             | ND   | 13.0  | ND          | 1.4   | ND              | ND    | ND    | 2.4   | 1.1   |
| <b>BDE-206</b> | ND   | 5.4             | ND   | 100.0 | 17.0        | 6.4   | 2.3377<br>64064 | 2.3   | 0.073 | 17.0  | ND    |
| <b>BDE-209</b> | 13.0 | 68.0            | 18.0 | 360.0 | 81.0        | 39.0  | 0               | 73.0  | 0.81  | 90.0  | 0     |
| <b>Sum BDE</b> | 48.0 | 52.0            | 20.0 | 130.0 | 100.0       | 50.0  | 16.0            | 78.0  | 3.0   | 130.0 | 3.7   |

|                | N     | O     | P    | Q     | R     | S     | T     | U    | W     | X     | Y     |
|----------------|-------|-------|------|-------|-------|-------|-------|------|-------|-------|-------|
| <b>TBA</b>     | 24.0  | 8.6   | 9.8  | 33.0  | 37.0  | 120.0 | ND    | 11.0 | 860.0 | 32.0  | ND    |
| <b>BDE-28</b>  | 0.34  | 0.23  | ND   | 0.78  | 0.25  | 0.19  | ND    | ND   | 0.33  | 0.12  | 0.033 |
| <b>BDE-47</b>  | 1.3   | 0.86  | 0.77 | 12.0  | ND    | 0.36  | 0.61  | ND   | 1.6   | 0.28  | 2.5   |
| <b>BDE-49</b>  | 0.26  | 0.052 | 0.14 | 2.2   | 0.31  | 0.083 | 0.087 | ND   | 0.17  | 0.094 | 0.034 |
| <b>BDE-66</b>  | 1.5   | ND    | ND   | 3.4   | 0.45  | 0.26  | 0.42  | ND   | ND    | 0.23  | ND    |
| <b>BDE-71</b>  | ND    | ND    | ND   | ND    | ND    | ND    | ND    | ND   | ND    | ND    | ND    |
| <b>BDE-77</b>  | ND    | ND    | ND   | ND    | ND    | ND    | ND    | ND   | ND    | ND    | ND    |
| <b>BDE-85</b>  | ND    | ND    | ND   | 0.011 | 0.028 | ND    | 0.46  | ND   | ND    | ND    | ND    |
| <b>BDE-99</b>  | 1.0   | 0.19  | 0.41 | 3.5   | ND    | 1.4   | ND    | ND   | 0.77  | 0.37  | 2.1   |
| <b>BDE-100</b> | 0.051 | 0.017 | 0.13 | 1.1   | ND    | 0.94  | ND    | ND0  | 0.53  | 0.27  | ND    |
| <b>BDE-119</b> | ND    | ND    | ND   | ND    | ND    | ND    | 0.32  | ND   | ND    | ND    | ND    |

|                |      |       |     |      |      |     |        |              |       |       |      |
|----------------|------|-------|-----|------|------|-----|--------|--------------|-------|-------|------|
| <b>BDE-138</b> | ND   | ND    | ND  | ND   | ND   | ND  | ND     | ND           | ND    | ND    | ND   |
| <b>BDE-153</b> | 0.03 | 0.057 | ND  | 0.11 | 0.10 | ND  | 0.11   | 0.034        | ND    | 0.13  | 0.3  |
| <b>BDE-154</b> | 0.01 | 0.036 | ND  | 0.67 | 0.23 | ND  | 0.079  | 0.0004<br>58 | ND    | 0.066 | 0.18 |
| <b>BDE-183</b> | 0.32 | ND    | ND  | 0.28 | 0.11 | ND  | 2.2    | ND           | ND    | ND    | ND   |
| <b>BDE-196</b> | 1.5  | ND    | ND  | ND   | 1.3  | ND  | 95.0   | ND           | 170.0 | ND    | ND   |
| <b>BDE-206</b> | 8.8  | 0.69  | ND  | 3.8  | ND   | ND  | 480.0  | ND           | 220.0 | 14.0  | ND   |
| <b>BDE-209</b> | ND   | 0.57  | ND  | 21.0 | ND   | ND  | 1100.0 | ND           | 590.0 | 43.0  | ND   |
| <b>Sum BDE</b> | 15.0 | 2.7   | 1.4 | 49.0 | 2.8  | 3.2 | 1700.0 | 0.035        | 980   | 59.0  | 5.4  |

|                | <b>Z</b> | <b>A1</b> | <b>C1</b> | <b>E1</b> | <b>F1</b> | <b>G1</b> | <b>H1</b> | <b>I1</b> |
|----------------|----------|-----------|-----------|-----------|-----------|-----------|-----------|-----------|
| <b>TBA</b>     | 120.0    | 110.0     | 490.0     | 100.0     | 410.0     | 48.0      | 47.0      | 69.0      |
| <b>BDE-28</b>  | ND       | 0.31      | ND        | 0.12      | 0.084     | 0.11      | ND        | 0.11      |
| <b>BDE-47</b>  | ND       | 5.1       | 3.3       | 3.0       | 2.5       | 0.61      | 0.94      | 1.6       |
| <b>BDE-49</b>  | ND       | 0.11      | ND        | ND        | ND        | 0.0074    | ND        | ND        |
| <b>BDE-66</b>  | ND       | 0.081     | ND        | ND        | ND        | ND        | ND        | ND        |
| <b>BDE-71</b>  | ND       | ND        | ND        | ND        | ND        | ND        | ND        | ND        |
| <b>BDE-77</b>  | 0.2      | ND        |
| <b>BDE-85</b>  | ND       | ND        | ND        | 0.89      | ND        | ND        | ND        | ND        |
| <b>BDE-99</b>  | 1.5      | 3.7       | 2.6       | 1.3       | 0.87      | 0.16      | 0.32      | 0.77      |
| <b>BDE-100</b> | ND       | 0.41      | 0.10      | 0.89      | ND        | ND        | ND        | ND        |
| <b>BDE-119</b> | ND       | ND        | ND        | ND        | ND        | ND        | ND        | ND        |
| <b>BDE-138</b> | ND       | ND        | ND        | ND        | ND        | ND        | ND        | ND        |
| <b>BDE-153</b> | 0.17     | ND        |
| <b>BDE-154</b> | 0.19     | ND        |
| <b>BDE-183</b> | 0.71     | 0.25      | ND        | ND        | 0.36      | ND        | ND        | ND        |
| <b>BDE-196</b> | ND       | ND        | ND        | ND        | ND        | ND        | ND        | ND        |
| <b>BDE-206</b> | 3.1      | ND        | ND        | ND        | 2.02      | ND        | 1.0       | 1.0       |
| <b>BDE-209</b> | ND       | ND        | 15.0      | 5.6       | 8.4       | ND        | 14.0      | 5.4       |
| <b>Sum BDE</b> | 5.9      | 10.0      | 21.0      | 12.0      | 14.0      | 0.89      | 16.0      | 8.9       |

**Table S4.** Troll Station chemical concentrations by sample set. Concentrations are presented in fg/m<sup>3</sup> to two significant figures. 'ND' denotes non-detected values.

|                | 1       | 2     | 3       | 4     | 5       | 6     | 7     | 8     | 9       | 10      | 11    | 12    | 13      |
|----------------|---------|-------|---------|-------|---------|-------|-------|-------|---------|---------|-------|-------|---------|
| <b>TBA</b>     | 1,900.0 | 170.0 | 190.0   | 30    | 5,000.0 | 550.0 | 590.0 | 510.0 | 13,000  | 14,000  | 870.0 | 260.0 | 19,000  |
| <b>BDE-28</b>  | 170.0   | 10.0  | 13.0    | 6.0   | 190.0   | 13.0  | 6.0   | 5.0   | 38.0    | 32.0    | 5.0   | 9.0   | 94.0    |
| <b>BDE-47</b>  | 7800.0  | 500.0 | 410.0   | 260.0 | 5,300.0 | 390.0 | 180.0 | 150.0 | 1,150.0 | 1,000.0 | 110.0 | 200.0 | 1,600.0 |
| <b>BDE-49</b>  | 190.0   | 15.0  | 11.0    | 7.0   | 180.0   | 11.0  | 4.0   | 3.0   | 30.0    | 35.0    | 3.0   | 6.0   | 49.0    |
| <b>BDE-66</b>  | 120.0   | 6.3   | 9.2     | 7.0   | 120.0   | 10.0  | 4.0   | 3.0   | 23.0    | 25.0    | 3.0   | 6.0   | 36.0    |
| <b>BDE-71</b>  | ND      | ND    | ND      | ND    | ND      | ND    | ND    | ND    | ND      | ND      | ND    | ND    | ND      |
| <b>BDE-77</b>  | ND      | ND    | ND      | ND    | ND      | ND    | ND    | ND    | ND      | ND      | ND    | ND    | ND      |
| <b>BDE-85</b>  | ND      | ND    | ND      | ND    | ND      | ND    | ND    | ND    | ND      | ND      | 2.0   | ND    | ND      |
| <b>BDE-99</b>  | 610.0   | 57.0  | 54.0    | 44.0  | 990.0   | 65.0  | 29.0  | 24.0  | 240     | 180.0   | 50.0  | 46.0  | 330.0   |
| <b>BDE-100</b> | 320.0   | 24.0  | 24.0    | 16.0  | 390.0   | 26.0  | 13.0  | 10.0  | 100.0   | 80.0    | 10.0  | 15.0  | 120.0   |
| <b>BDE-119</b> | ND      | ND    | ND      | ND    | ND      | ND    | ND    | ND    | ND      | ND      | ND    | ND    | ND      |
| <b>BDE-138</b> | ND      | ND    | ND      | ND    | ND      | ND    | ND    | ND    | ND      | ND      | ND    | ND    | ND      |
| <b>BDE-153</b> | ND      | ND    | ND      | ND    | 30.0    | ND    | ND    | ND    | ND      | ND      | ND    | ND    | ND      |
| <b>BDE-154</b> | 9.8     | ND    | ND      | ND    | 34.0    | ND    | ND    | ND    | ND      | ND      | ND    | ND    | 11.0    |
| <b>BDE-183</b> | ND      | ND    | ND      | ND    | 24.0    | ND    | ND    | ND    | ND      | ND      | ND    | ND    | 13.0    |
| <b>BDE-196</b> | ND      | ND    | ND      | ND    | ND      | ND    | ND    | ND    | ND      | ND      | ND    | ND    | ND      |
| <b>BDE-206</b> | 290.0   | ND    | 120.0   | ND    | 150.0   | ND    | ND    | ND    | 92.0    | 110.0   | ND    | ND    | 51.0    |
| <b>BDE-209</b> | 9,200   | 490.0 | 1,600.0 | ND    | 2,300.0 | ND    | ND    | ND    | 1,300.0 | 640.0   | ND    | ND    | 1,400.0 |

|            |       |       |       |     |       |     |     |     |       |       |     |     |       |
|------------|-------|-------|-------|-----|-------|-----|-----|-----|-------|-------|-----|-----|-------|
| <b>Sum</b> | 18,70 | 1,100 | 2,200 | 340 | 9,700 | 515 | 236 | 195 | 3,000 | 2,100 | 180 | 280 | 3,700 |
| <b>BDE</b> | 0     |       |       |     |       |     |     |     |       |       |     |     |       |

|                | 14     | 15      | 16     | 17     | 18     | 19     | 20    | 21     | 22    | 23    | 24    | 25     | 26    |
|----------------|--------|---------|--------|--------|--------|--------|-------|--------|-------|-------|-------|--------|-------|
| <b>TBA</b>     | 18,000 | 25,000  | 27,000 | 24,000 | 25,000 | 26,000 | 3,200 | 26,000 | 3,300 | 1,800 | 2,400 | 21,000 | 2,500 |
| <b>BDE-28</b>  | 42.0   | 98.0    | 22.0   | 27.0   | 21.0   | 46.0   | 3.0   | 72.0   | 110.0 | 2.0   | 4.0   | 22.0   | 1.9   |
| <b>BDE-47</b>  | 820.0  | 1,900.0 | 430.0  | 400.0  | 610.0  | 620.0  | 52.0  | 1,100  | 2,500 | 40.0  | 63.0  | 400.0  | 28.0  |
| <b>BDE-49</b>  | 28.0   | 73.0    | 16.0   | 15.0   | 15.0   | 17.0   | 1.7   | 45.0   | 59.0  | ND    | 1.7   | 23.0   | 2.0   |
| <b>BDE-66</b>  | 26.0   | 57.0    | 13.0   | 11.0   | 13.0   | 14.0   | ND    | 40.0   | 34.0  | ND    | 2.2   | 21.0   | ND    |
| <b>BDE-71</b>  | ND     | 34.0    | ND     | ND     | ND     | ND     | ND    | ND     | 9.6   | ND    | ND    | ND     | ND    |
| <b>BDE-77</b>  | ND     | ND      | ND     | ND     | ND     | ND     | ND    | ND     | ND    | ND    | ND    | ND     | ND    |
| <b>BDE-85</b>  | ND     | ND      | ND     | ND     | ND     | ND     | ND    | ND     | 4.0   | ND    | ND    | ND     | ND    |
| <b>BDE-99</b>  | 170.0  | 540.0   | 130.0  | 77.0   | 210.0  | 110.0  | ND    | 320.0  | 180.0 | ND    | 16.0  | 120.0  | ND    |
| <b>BDE-100</b> | 73.0   | 190.0   | 43.0   | 32.0   | 64.0   | 50.0   | ND    | 120.0  | 82.0  | ND    | 6.3   | 42.0   | ND    |
| <b>BDE-119</b> | ND     | ND      | ND     | ND     | ND     | ND     | ND    | ND     | ND    | ND    | ND    | ND     | ND    |
| <b>BDE-138</b> | ND     | ND      | ND     | ND     | ND     | ND     | ND    | ND     | ND    | ND    | ND    | ND     | ND    |
| <b>BDE-153</b> | ND     | 20.0    | ND     | ND     | ND     | ND     | ND    | ND     | 4.9   | ND    | ND    | ND     | ND    |
| <b>BDE-154</b> | ND     | 17.0    | ND     | ND     | ND     | ND     | ND    | 15.0   | 4.3   | ND    | ND    | ND     | ND    |
| <b>BDE-183</b> | ND     | ND      | ND     | ND     | ND     | ND     | ND    | ND     | 8.4   | ND    | ND    | ND     | ND    |
| <b>BDE-196</b> | ND     | ND      | ND     | ND     | 302    | ND     | ND    | ND     | ND    | ND    | ND    | ND     | ND    |
| <b>BDE-206</b> | ND     | 43.0    | ND     | ND     | 1,200  | 290.0  | ND    | ND     | 130.0 | ND    | ND    | 110.0  | ND    |



|                |       |       |       |       |       |       |    |       |       |    |    |       |       |
|----------------|-------|-------|-------|-------|-------|-------|----|-------|-------|----|----|-------|-------|
| <b>BDE-209</b> | ND    | 520.0 | 450.0 | 420.0 | 3,300 | 5,500 | ND | ND    | 770.0 | ND | ND | 1,900 | 380.0 |
| <b>Sum BDE</b> | 1,100 | 3,500 | 1,100 | 980   | 5,700 | 6,600 | 57 | 1,700 | 3,900 | 42 | 93 | 2,600 | 410   |

[illegible]

|                |     |    |    |       |    |     |       |    |    |    |    |       |     |
|----------------|-----|----|----|-------|----|-----|-------|----|----|----|----|-------|-----|
| <b>BDE-206</b> | ND  | ND | ND | 100.0 | ND | ND  | 190.0 | ND | ND | ND | ND | 87.0  | ND  |
| <b>BDE-209</b> | ND  | ND | ND | 1,000 | ND | ND  | 4,100 | ND | ND | ND | ND | 2,200 | ND  |
| <b>Sum BDE</b> | 100 | 25 | 34 | 1,100 | 44 | 140 | 4,500 | 63 | 47 | 70 | ND | 2,400 | 140 |

**Table S5.** Average analyte mass held within the last (3 of 3) PUF in the sampling train (size adjusted), where ~33% indicates complete saturation of media for the analyte.

| Analyte | % Analyte Mass held in Final PUF |
|---------|----------------------------------|
| TBA     | 20                               |
| BDE-28  | 34                               |
| BDE-47  | 34                               |
| BDE-49  | 24                               |
| BDE-66  | 28                               |
| BDE-71  | 3                                |
| BDE-77  | 12                               |
| BDE-85  | 6                                |
| BDE-99  | 29                               |
| BDE-100 | 34                               |
| BDE-119 | 3                                |
| BDE-138 | 3                                |
| BDE-153 | 9                                |
| BDE-154 | 8                                |
| BDE-183 | 16                               |
| BDE-196 | 15                               |
| BDE-206 | 22                               |
| BDE-209 | 27                               |
